# Supplementary material
Source: PubMed Central journal article supplement (PMC2793756)
Supplement: supp_3_6_326__1.pdf [file supp_3_6_326__1.pdf]

## VTE Prophylaxis Orders and Flow Sheet

Date: \_\_\_\_\_ Patient Name: \_\_\_\_\_ Age: \_\_\_\_\_ Weight: \_\_\_\_\_

Diagnosis: \_\_\_\_\_ Most recent chemotherapy date: \_\_\_\_\_

Regimen: \_\_\_\_\_ Surgery Date \_\_\_\_\_

### JUSTIFICATION FOR USE:

|                        |                                                                                                                                                                                                                                                                                                                                                                                                            |
|------------------------|------------------------------------------------------------------------------------------------------------------------------------------------------------------------------------------------------------------------------------------------------------------------------------------------------------------------------------------------------------------------------------------------------------|
| <u>Hospitalization</u> | <input type="checkbox"/> Patient is hospitalized and does not have contraindications for anticoagulation                                                                                                                                                                                                                                                                                                   |
| <u>Perioperative</u>   | <input type="checkbox"/> Patient undergoing major surgery* for cancer and does not have contraindications for anticoagulation<br>Site: <input type="checkbox"/> Abdominal <input type="checkbox"/> Pelvic <input type="checkbox"/> Gynecologic <input type="checkbox"/> Intracranial                                                                                                                       |
| <u>Ambulatory</u>      | <input type="checkbox"/> Patient has Multiple Myeloma and is receiving thalidomide or lenalidomide plus chemotherapy and/or dexamethasone and does not have contraindications for anticoagulation<br><input type="checkbox"/> thalidomide <input type="checkbox"/> lenalidomide <input type="checkbox"/> chemotherapy <input type="checkbox"/> dexamethasone <input type="checkbox"/> other corticosteroid |

### CONTRAINDICATIONS:

|                                                                                                                                                  |                                                                         |                                                                           |
|--------------------------------------------------------------------------------------------------------------------------------------------------|-------------------------------------------------------------------------|---------------------------------------------------------------------------|
| <b>WARNING: If patient has contraindications to anticoagulation do not administer VTE prophylaxis or treatment or use only w/extreme caution</b> |                                                                         |                                                                           |
| <input type="checkbox"/> active, uncontrollable bleeding                                                                                         | <input type="checkbox"/> recent intracranial surgery                    | <input type="checkbox"/> preexisting thrombocytopenia                     |
| <input type="checkbox"/> active cerebrovascular hemorrhage                                                                                       | <input type="checkbox"/> active peptic or other GI ulceration           | <input type="checkbox"/> preexisting coagulopathy                         |
| <input type="checkbox"/> dissecting or cerebral aneurysm                                                                                         | <input type="checkbox"/> severe, uncontrolled or malignant hypertension | <input type="checkbox"/> heparin-induced thrombocytopenia (heparin, LMWH) |
| <input type="checkbox"/> bacterial endocarditis                                                                                                  | <input type="checkbox"/> severe head trauma                             | <input type="checkbox"/> epidural catheter placement                      |
| <input type="checkbox"/> pericarditis                                                                                                            | <input type="checkbox"/> pregnancy (warfarin)                           |                                                                           |

### PLAN FOR PROPHYLACTIC ANTICOAGULATION:

| Anticoagulant                | Dose and Modifications | Regimen       | Route  | Schedule |  |  |  |  |  |  |  |
|------------------------------|------------------------|---------------|--------|----------|--|--|--|--|--|--|--|
|                              |                        |               |        |          |  |  |  |  |  |  |  |
| Unfractionated Heparin (UFH) | 5000 Units             | Every 8 hours | Subcut |          |  |  |  |  |  |  |  |
| Dalteparin                   | 5000 Units             | Daily         | Subcut |          |  |  |  |  |  |  |  |
| Enoxaparin                   | 40 mg                  | Daily         | Subcut |          |  |  |  |  |  |  |  |
| Fondaparinux                 | 2.5 mg                 | Daily         | Subcut |          |  |  |  |  |  |  |  |
|                              |                        |               |        |          |  |  |  |  |  |  |  |
|                              |                        |               |        |          |  |  |  |  |  |  |  |
|                              |                        |               |        |          |  |  |  |  |  |  |  |
|                              |                        |               |        |          |  |  |  |  |  |  |  |

Dalteparin (Fragmin ®); Enoxaparin (Lovenox ®); Fondaparinux (Arixtra ®); Tinzaparin (Innohep ®)

| Mechanical Method |  |  |  | Schedule |
|-------------------|--|--|--|----------|
|                   |  |  |  |          |
|                   |  |  |  |          |
|                   |  |  |  |          |

For patients receiving chemotherapy - Write dose to be given in appropriate box. After it is administered, write in site and your initials.

| Cycle # | Day of cycle | Date to be given | Dose to be given | MD Initials | Dose given | Site | RN Initials |
|---------|--------------|------------------|------------------|-------------|------------|------|-------------|
|         |              |                  |                  |             |            |      |             |
|         |              |                  |                  |             |            |      |             |
|         |              |                  |                  |             |            |      |             |
|         |              |                  |                  |             |            |      |             |
|         |              |                  |                  |             |            |      |             |
|         |              |                  |                  |             |            |      |             |
|         |              |                  |                  |             |            |      |             |
|         |              |                  |                  |             |            |      |             |

Notes: \* Major surgery defined as laparotomy, laparoscopy, or thoracotomy lasting >30 minutes

Reviewed by \_\_\_\_\_ on \_\_\_\_\_

This flow sheet is derived from recommendations in the ASCO 2007 Clinical Practice Guideline Update On The Use of VTE Prophylaxis and Treatment in Patients with Cancer. This flow sheet is a practice tool based on ASCO® practice guidelines and is not intended to substitute for the independent professional judgment of the treating physician. Practice guidelines do not account for individual variation among patients. This tool does not purport to suggest any particular course of medical treatment. Use of the practice guidelines and this flow sheet are voluntary. The practice guidelines and additional information are available at <http://www.asco.org/guidelines/vte>. Copyright © 2007 by the American Society of Clinical Oncology. All rights reserved.
